# Supplementary material for: USP13 functions as a tumor suppressor by blocking the NF-kB-mediated PTEN downregulation in human bladder cancer
Source: Springer Nature journal article supplement (doi:10.1186/s13046-019-1262-4), 2019-06-14

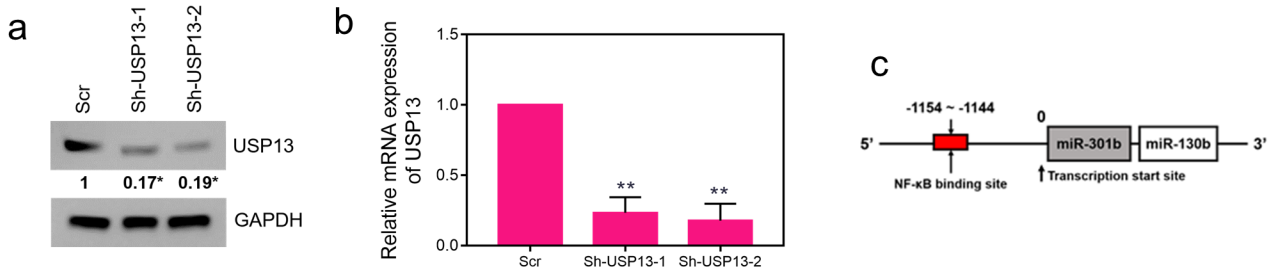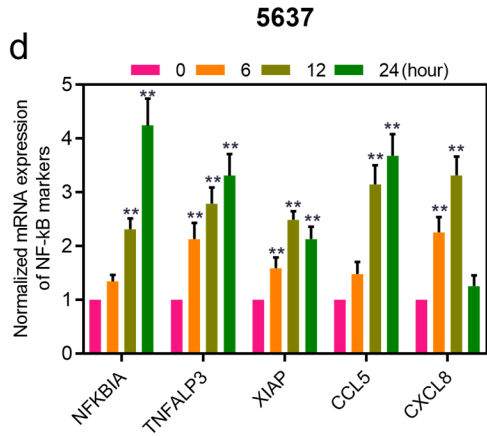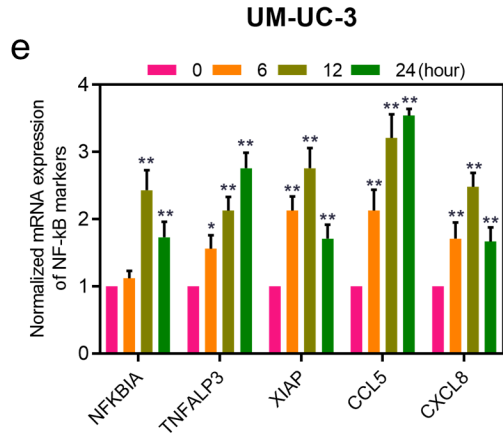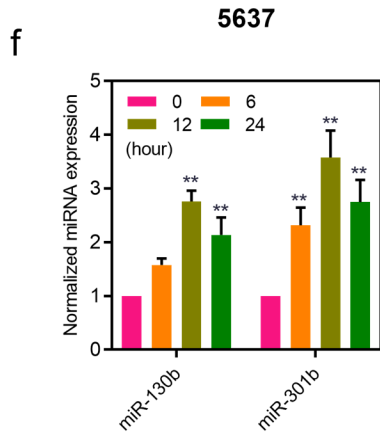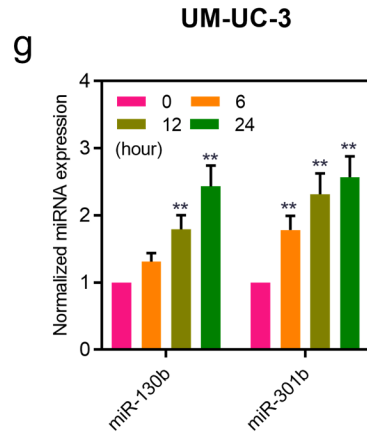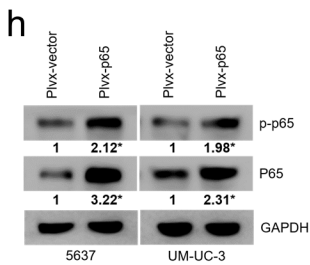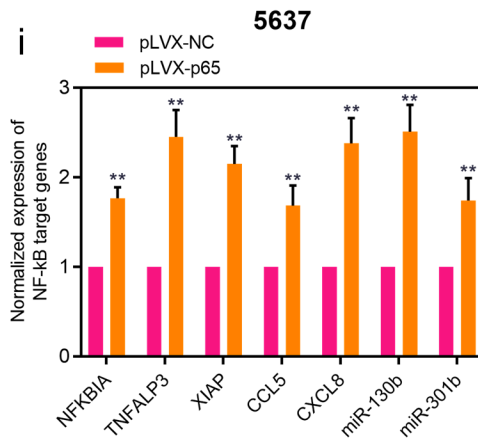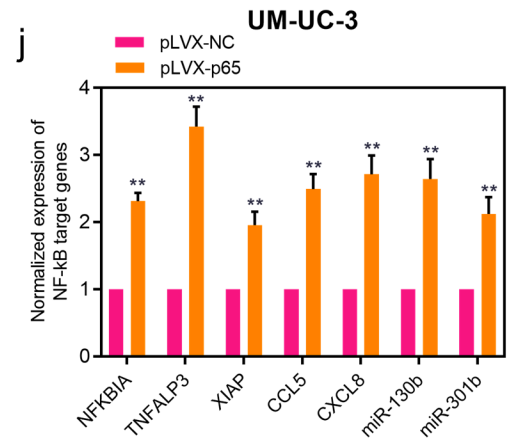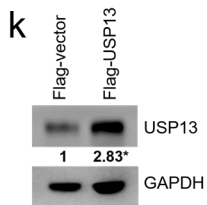

Supplement: MOESM3 [file 16814006]
