# Supplementary material for: USP13 functions as a tumor suppressor by blocking the NF-kB-mediated PTEN downregulation in human bladder cancer
Source: Springer Nature journal article supplement (doi:10.1186/s13046-019-1262-4), 2019-06-14

|               |   |   |   |
|---------------|---|---|---|
| TNF- $\alpha$ | - | + | - |
| Flag-vector   | + | - | - |
| Flag-USP13    | - | + | + |

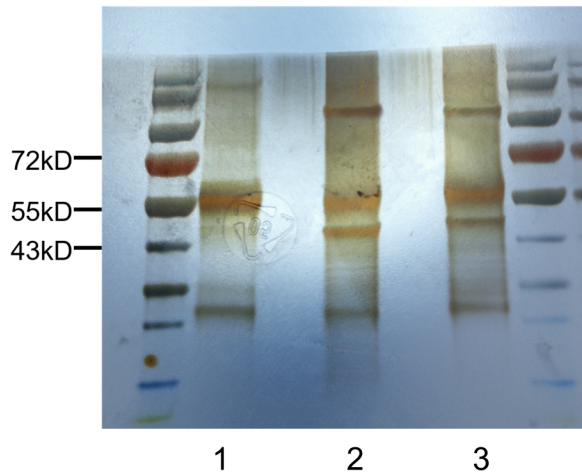

Supplement: MOESM4 [file 16814006]
